# Supplementary material
Source: publisher figshare collection journal article supplement (https://tandf.figshare.com/articles/dataset/_/5630188)
Supplement: Supplementary file 1 [file 1]

**Supplementary Table 5. U-Pb SHRIMP data for zircons from La Cabaña chromitite boulders.**

| CAB-71<br>Spot | U<br>(ppm) | Th<br>(ppm) | $^{232}\text{Th}/^{238}\text{U}$ | %<br>$^{206}\text{Pb}_{\text{bc}}$ | $^{204}\text{Pb}/^{206}\text{Pb}$ | $\pm\%$ | (1)<br>$^{207}\text{Pb}^*/^{206}\text{Pb}^*$ | $\pm\%$ | (1)<br>$^{207}\text{Pb}^*/^{235}\text{U}$ | $\pm\%$ | (1)<br>$^{206}\text{Pb}^*/^{238}\text{U}$ | $\pm\%$ | (1)<br>$^{206}\text{Pb}/^{238}\text{U}$<br>Age | $\pm$    | (2)<br>$^{206}\text{Pb}/^{238}\text{U}$<br>Age | $\pm$    | (1)<br>$^{207}\text{Pb}/^{206}\text{Pb}$<br>Age | $\pm$    | %<br>Discordant |
|----------------|------------|-------------|----------------------------------|------------------------------------|-----------------------------------|---------|----------------------------------------------|---------|-------------------------------------------|---------|-------------------------------------------|---------|------------------------------------------------|----------|------------------------------------------------|----------|-------------------------------------------------|----------|-----------------|
| CAB-71z6       | 154        | 37          | 0.25                             | --                                 | -2.20E-04                         | 58      | 0.084                                        | 2.7     | 2.15                                      | 3.2     | 0.186                                     | 1.8     | 1099                                           | $\pm 18$ | 1090                                           | $\pm 19$ | 1287                                            | $\pm 52$ | 16              |
| CAB-71z8       | 550        | 8           | 0.01                             | 0.26                               | 1.40E-04                          | 50      | 0.06                                         | 4.3     | 0.82                                      | 4.5     | 0.099                                     | 1.3     | 607                                            | $\pm 7$  | 607                                            | $\pm 8$  | 621                                             | $\pm 94$ | 2               |
| CAB-71z9c      | 293        | 329         | 1.16                             | 0.76                               | 4.40E-04                          | 35      | 0.066                                        | 3.8     | 1.32                                      | 4.1     | 0.144                                     | 1.5     | 869                                            | $\pm 12$ | 871                                            | $\pm 13$ | 810                                             | $\pm 79$ | -8              |
| CAB-71z9r      | 459        | 5           | 0.01                             | --                                 | -1.70E-04                         | 58      | 0.061                                        | 3.4     | 0.65                                      | 3.7     | 0.078                                     | 1.3     | 484                                            | $\pm 6$  | 481                                            | $\pm 6$  | 637                                             | $\pm 73$ | 25              |
| CAB-71z10      | 378        | 117         | 0.32                             | 0.11                               | 6.50E-05                          | 71      | 0.071                                        | 1.5     | 1.44                                      | 2       | 0.147                                     | 1.3     | 884                                            | $\pm 11$ | 881                                            | $\pm 11$ | 965                                             | $\pm 30$ | 9               |
| CAB-71z11      | 304        | 453         | 1.54                             | --                                 | -1.30E-04                         | 71      | 0.062                                        | 2.8     | 0.8                                       | 3.1     | 0.093                                     | 1.4     | 574                                            | $\pm 8$  | 572                                            | $\pm 8$  | 691                                             | $\pm 60$ | 18              |
| CAB-71z12      | 271        | 154         | 0.59                             | 0.03                               | 2.00E-05                          | 100     | 0.122                                        | 1.2     | 5.83                                      | 1.9     | 0.346                                     | 1.5     | 1917                                           | $\pm 24$ | 1907                                           | $\pm 28$ | 1985                                            | $\pm 22$ | 4               |
| CAB-71z13r     | 399        | 5           | 0.01                             | 0.11                               | 6.10E-05                          | 100     | 0.057                                        | 3.4     | 0.55                                      | 3.6     | 0.071                                     | 1.3     | 443                                            | $\pm 6$  | 442                                            | $\pm 6$  | 473                                             | $\pm 75$ | 7               |

(1) Common Pb corrected using  $^{204}\text{Pb}$  and (2) Common Pb corrected assuming  $^{206}\text{Pb}/^{238}\text{U}$ - $^{207}\text{Pb}/^{235}\text{U}$  age-concordance

| CA14-5<br>Spot | U<br>(ppm) | Th<br>(ppm) | $^{232}\text{Th}/^{238}\text{U}$ | %<br>$^{206}\text{Pb}$ | $^{204}\text{Pb}/^{206}\text{Pb}$ | $\pm\%$ | (1)<br>$^{207}\text{Pb}^*/^{206}\text{Pb}^*$ | $\pm\%$ | (1)<br>$^{207}\text{Pb}^*/^{235}\text{U}$ | $\pm\%$ | (1)<br>$^{206}\text{Pb}^*/^{238}\text{U}$ | $\pm\%$ | (1)<br>$^{206}\text{Pb}/^{238}\text{U}$<br>Age | $\pm$   | (2)<br>$^{206}\text{Pb}/^{238}\text{U}$<br>Age | $\pm$   | (1)<br>$^{207}\text{Pb}/^{206}\text{Pb}$<br>Age | $\pm$     | %<br>Discordant |
|----------------|------------|-------------|----------------------------------|------------------------|-----------------------------------|---------|----------------------------------------------|---------|-------------------------------------------|---------|-------------------------------------------|---------|------------------------------------------------|---------|------------------------------------------------|---------|-------------------------------------------------|-----------|-----------------|
| CA14-5z6       | 319        | 8           | 0.03                             | --                     | -1.90E-04                         | 71      | 0.064                                        | 7.9     | 0.41                                      | 8       | 0.046                                     | 1.5     | 291                                            | $\pm 4$ | 287                                            | $\pm 4$ | 755                                             | $\pm 167$ | 63              |

(1) Common Pb corrected using  $^{204}\text{Pb}$  and (2) Common Pb corrected assuming  $^{206}\text{Pb}/^{238}\text{U}$ - $^{207}\text{Pb}/^{235}\text{U}$  age-concordance

| CA14-39<br>Spot  | U<br>(ppm) | Th<br>(ppm) | $^{232}\text{Th}/^{238}\text{U}$ | %<br>$^{206}\text{Pb}$ | $^{204}\text{Pb}/^{206}\text{Pb}$ | $\pm\%$ | (1)<br>$^{207}\text{Pb}^*/^{206}\text{Pb}^*$ | $\pm\%$ | (1)<br>$^{207}\text{Pb}^*/^{235}\text{U}$ | $\pm\%$ | (1)<br>$^{206}\text{Pb}^*/^{238}\text{U}$ | $\pm\%$ | (1)<br>$^{206}\text{Pb}/^{238}\text{U}$<br>Age | $\pm$   | (2)<br>$^{206}\text{Pb}/^{238}\text{U}$<br>Age | $\pm$   | (1)<br>$^{207}\text{Pb}/^{206}\text{Pb}$<br>Age | $\pm$     | %<br>Discordant |
|------------------|------------|-------------|----------------------------------|------------------------|-----------------------------------|---------|----------------------------------------------|---------|-------------------------------------------|---------|-------------------------------------------|---------|------------------------------------------------|---------|------------------------------------------------|---------|-------------------------------------------------|-----------|-----------------|
| CA14-39z1        | 430        | 6           | 0.01                             | --                     | -3.90E-04                         | 41      | 0.061                                        | 4.2     | 0.42                                      | 4.6     | 0.05                                      | 2       | 312                                            | $\pm 6$ | 309                                            | $\pm 6$ | 629                                             | $\pm 90$  | 52              |
| CA14-39z2        | 470        | 240         | 0.53                             | 0.97                   | 5.20E-04                          | 38      | 0.049                                        | 6.5     | 0.35                                      | 6.7     | 0.051                                     | 1.7     | 323                                            | $\pm 5$ | 324                                            | $\pm 5$ | 153                                             | $\pm 152$ | -113            |
| CA14-39z2...dup1 | 848        | 24          | 0.03                             | 0.61                   | 3.30E-04                          | 33      | 0.054                                        | 3.4     | 0.33                                      | 4.2     | 0.045                                     | 2.6     | 282                                            | $\pm 7$ | 281                                            | $\pm 7$ | 374                                             | $\pm 76$  | 25              |

(1) Common Pb corrected using  $^{204}\text{Pb}$  and (2) Common Pb corrected assuming  $^{206}\text{Pb}/^{238}\text{U}$ - $^{207}\text{Pb}/^{235}\text{U}$  age-concordance

| CA14-41<br>Spot | U<br>(ppm) | Th<br>(ppm) | $^{232}\text{Th}$<br>/ $^{238}\text{U}$ | %<br>$^{206}\text{Pb}$ <sub>bc</sub> | $^{204}\text{Pb}$<br>/ $^{206}\text{Pb}$ | ±% | (1)<br>$^{207}\text{Pb}^*$<br>/ $^{206}\text{Pb}^*$ | ±%  | (1)<br>$^{207}\text{Pb}^*$<br>/ $^{235}\text{U}$ | ±%  | (1)<br>$^{206}\text{Pb}^*$<br>/ $^{238}\text{U}$ | ±%  | (1)<br>$^{206}\text{Pb}$<br>/ $^{238}\text{U}$<br><br>Age |    | (2)<br>$^{206}\text{Pb}$<br>/ $^{238}\text{U}$<br><br>Age |    | (1)<br>$^{207}\text{Pb}$<br>/ $^{206}\text{Pb}$<br><br>Age |     | %<br>Discordant |
|-----------------|------------|-------------|-----------------------------------------|--------------------------------------|------------------------------------------|----|-----------------------------------------------------|-----|--------------------------------------------------|-----|--------------------------------------------------|-----|-----------------------------------------------------------|----|-----------------------------------------------------------|----|------------------------------------------------------------|-----|-----------------|
| CA14-41z8       | 351        | 58          | 0.17                                    | 0.69                                 | 3.80E-04                                 | 41 | 0.059                                               | 4.3 | 0.54                                             | 4.8 | 0.067                                            | 2.2 | 419                                                       | ±9 | 418                                                       | ±9 | 557                                                        | ±95 | 25              |
| CA14-41z11r     | 808        | 331         | 0.42                                    | 0.82                                 | 4.60E-04                                 | 25 | 0.061                                               | 3.5 | 0.59                                             | 3.7 | 0.07                                             | 1.4 | 434                                                       | ±6 | 431                                                       | ±6 | 639                                                        | ±75 | 33              |
| CA14-41z12c     | 535        | 149         | 0.29                                    | 0.42                                 | 2.30E-04                                 | 45 | 0.053                                               | 3.3 | 0.41                                             | 4.3 | 0.057                                            | 2.7 | 354                                                       | ±9 | 355                                                       | ±9 | 315                                                        | ±75 | -13             |

(1) Common Pb corrected using  $^{204}\text{Pb}$  and (2) Common Pb corrected assuming  $^{206}\text{Pb}/^{238}\text{U}$ - $^{207}\text{Pb}/^{235}\text{U}$  age-concordance
