# Supplementary material
Source: publisher figshare collection journal article supplement (https://tandf.figshare.com/articles/dataset/_/5630188)
Supplement: Supplementary file 2 [file 1]

**Supplementary Table 2. Zircon mount SHRIMP U-Pb data of CA14-4 biotitite schist (blackwall).**

| Spot       | U<br>(ppm) | Th<br>(ppm) | <sup>232</sup> Th<br>/ <sup>238</sup> U | %<br><sup>206</sup> Pb <sub>bc</sub> | <sup>204</sup> Pb<br>/ <sup>206</sup> Pb | ±%  | (1)<br><sup>207</sup> Pb*<br>/ <sup>206</sup> Pb* | ±%  | (1)<br><sup>207</sup> Pb*<br>/ <sup>235</sup> U | ±%  | (1)<br><sup>206</sup> Pb*<br>/ <sup>238</sup> U | ±%  | (1)<br><sup>206</sup> Pb<br>/ <sup>238</sup> U<br><br>Age |     | (2)<br><sup>206</sup> Pb<br>/ <sup>238</sup> U<br><br>Age |     | (1)<br><sup>207</sup> Pb<br>/ <sup>206</sup> Pb<br><br>Age |      | %<br>Discordant |
|------------|------------|-------------|-----------------------------------------|--------------------------------------|------------------------------------------|-----|---------------------------------------------------|-----|-------------------------------------------------|-----|-------------------------------------------------|-----|-----------------------------------------------------------|-----|-----------------------------------------------------------|-----|------------------------------------------------------------|------|-----------------|
| CA14-4z2   | 1902       | 60          | 0.03                                    | 0                                    | 1.20E-06                                 | 100 | 0.205                                             | 0.3 | 14.99                                           | 1.6 | 0.531                                           | 1.6 | 2744                                                      | ±35 | 2693                                                      | ±48 | 2866                                                       | ±5   | 5               |
| CA14-4z3c  | 39         | 93          | 2.46                                    | 0.88                                 | 5.30E-04                                 | 71  | 0.079                                             | 7.9 | 2.03                                            | 8.5 | 0.185                                           | 3.1 | 1097                                                      | ±31 | 1093                                                      | ±32 | 1183                                                       | ±156 | 8               |
| CA14-4z6   | 269        | 213         | 0.82                                    | 0.11                                 | 6.20E-05                                 | 100 | 0.058                                             | 3.9 | 0.66                                            | 4.4 | 0.082                                           | 1.9 | 510                                                       | ±9  | 510                                                       | ±10 | 544                                                        | ±86  | 6               |
| CA14-4z7   | 543        | 319         | 0.61                                    | 0.01                                 | 9.10E-06                                 | 100 | 0.105                                             | 2.2 | 4.37                                            | 3.2 | 0.302                                           | 2.3 | 1699                                                      | ±34 | 1697                                                      | ±38 | 1716                                                       | ±41  | 1               |
| CA14-4z8c  | 321        | 288         | 0.93                                    | --                                   | -2.80E-05                                | 71  | 0.106                                             | 0.7 | 4.55                                            | 1.5 | 0.311                                           | 1.3 | 1747                                                      | ±20 | 1749                                                      | ±23 | 1730                                                       | ±14  | -1              |
| CA14-4z8r  | 310        | 204         | 0.68                                    | 0.1                                  | 6.50E-05                                 | 50  | 0.105                                             | 0.9 | 4.46                                            | 2   | 0.307                                           | 1.8 | 1725                                                      | ±28 | 1725                                                      | ±31 | 1721                                                       | ±16  | 0               |
| CA14-4z9   | 529        | 288         | 0.56                                    | 0                                    | ---                                      | 100 | 0.055                                             | 1.6 | 0.52                                            | 2.1 | 0.069                                           | 1.2 | 430                                                       | ±5  | 430                                                       | ±5  | 415                                                        | ±37  | -4              |
| CA14-4z10r | 523        | 89          | 0.18                                    | 0.96                                 | 5.40E-04                                 | 27  | 0.059                                             | 4   | 0.56                                            | 4.2 | 0.069                                           | 1.2 | 428                                                       | ±5  | 426                                                       | ±5  | 564                                                        | ±86  | 25              |
| CA14-4z11  | 587        | 528         | 0.93                                    | 0.86                                 | 4.80E-04                                 | 30  | 0.058                                             | 4.1 | 0.47                                            | 4.4 | 0.059                                           | 1.7 | 368                                                       | ±6  | 367                                                       | ±6  | 518                                                        | ±90  | 30              |
| CA14-4z12  | 548        | 179         | 0.34                                    | 0.29                                 | 1.60E-04                                 | 50  | 0.052                                             | 2.8 | 0.46                                            | 3.1 | 0.064                                           | 1.3 | 400                                                       | ±5  | 401                                                       | ±5  | 299                                                        | ±64  | -35             |
| CA14-4z1c  | 862        | 485         | 0.58                                    | 0                                    | ---                                      | --- | 0.061                                             | 3.2 | 0.76                                            | 3.7 | 0.089                                           | 1.9 | 551                                                       | ±10 | 549                                                       | ±10 | 654                                                        | ±69  | 16              |
| CA14-4z1r  | 525        | 173         | 0.34                                    | 0.05                                 | 3.10E-05                                 | 100 | 0.057                                             | 1.5 | 0.62                                            | 1.9 | 0.079                                           | 1.2 | 490                                                       | ±6  | 489                                                       | ±6  | 494                                                        | ±32  | 1               |
| CA14-4z4c  | 721        | 410         | 0.59                                    | 0.15                                 | 9.10E-05                                 | 33  | 0.073                                             | 0.9 | 1.81                                            | 1.4 | 0.18                                            | 1.2 | 1064                                                      | ±11 | 1066                                                      | ±12 | 1016                                                       | ±18  | -5              |
| CA14-4z5   | 80         | 105         | 1.36                                    | 0                                    | ---                                      | 100 | 0.082                                             | 1.8 | 2.37                                            | 2.7 | 0.21                                            | 2.1 | 1229                                                      | ±23 | 1228                                                      | ±25 | 1243                                                       | ±35  | 1               |
| CA14-4z4r  | 654        | 439         | 0.69                                    | 0.48                                 | 2.70E-04                                 | 29  | 0.063                                             | 2.1 | 0.85                                            | 3.7 | 0.099                                           | 3   | 606                                                       | ±18 | 604                                                       | ±18 | 705                                                        | ±45  | 15              |

(1) Common Pb corrected using <sup>204</sup>Pb and (2) Common Pb corrected assuming <sup>206</sup>Pb/<sup>238</sup>U-<sup>207</sup>Pb/<sup>235</sup>U age-concordance
