# Supplementary material
Source: publisher figshare collection journal article supplement (https://tandf.figshare.com/articles/dataset/_/5630188)
Supplement: Supplementary file 3 [file 1]

**Supplementary Table 4. Zircon mount LA-MC-ICPMS U-Pb data of LAV-14-5 chloritite schist (blackwall).**

| Spot     | 207Pb/<br>235U |         | 206Pb/<br>238U |         | 238U/<br>206Pb |         | 207Pb/<br>206Pb |         | 206Pb/<br>238Pb<br>Age<br>(Ma) |      | 207Pb/<br>206Pb<br>Age<br>(Ma) |       | U<br>(ppm) | Th<br>(ppm) | U/Th<br>Ratio |
|----------|----------------|---------|----------------|---------|----------------|---------|-----------------|---------|--------------------------------|------|--------------------------------|-------|------------|-------------|---------------|
| LAV14_2  | 0.59500        | 0.03700 | 0.07710        | 0.00420 | 12.97017       | 0.70655 | 0.05594         | 0.00069 | 479                            | 25   | 449.0                          | 28.0  | 420        | 215         | 1.95          |
| LAV14_3  | 1.93000        | 0.12000 | 0.16030        | 0.00670 | 6.23830        | 0.26074 | 0.08670         | 0.00240 | 958.0                          | 37.0 | 1350.0                         | 53.0  | 451        | 198         | 2.28          |
| LAV14_4  | 1.38300        | 0.09700 | 0.13730        | 0.00810 | 7.28332        | 0.42968 | 0.07321         | 0.00095 | 829.0                          | 46.0 | 1019.0                         | 26.0  | 469        | 252         | 1.86          |
| LAV14_5  | 0.66900        | 0.02800 | 0.07980        | 0.00380 | 12.53133       | 0.59673 | 0.06091         | 0.00076 | 502.0                          | 26.0 | 643.0                          | 30.0  | 615        | 321         | 1.92          |
| LAV14_6  | 0.48100        | 0.01800 | 0.04080        | 0.00230 | 24.50980       | 1.38168 | 0.08500         | 0.00600 | 258.0                          | 14.0 | 1300.0                         | 140.0 | 785        | 306         | 2.57          |
| LAV14_7  | 0.58540        | 0.01300 | 0.07550        | 0.00170 | 13.24503       | 0.29823 | 0.05691         | 0.00045 | 469.3                          | 10.0 | 488.0                          | 17.0  | 819        | 365         | 2.24          |
| LAV14_8  | 0.63500        | 0.02400 | 0.08120        | 0.00190 | 12.31527       | 0.28817 | 0.05657         | 0.00033 | 503.3                          | 12.0 | 474.9                          | 13.0  | 1130       | 526         | 2.15          |
| LAV14_9  | 0.54500        | 0.02600 | 0.06710        | 0.00320 | 14.90313       | 0.71073 | 0.05966         | 0.00056 | 419.0                          | 19.0 | 591.0                          | 20.0  | 806        | 403         | 2.00          |
| LAV14_10 | 0.84230        | 0.02000 | 0.10128        | 0.00180 | 9.87362        | 0.17548 | 0.06131         | 0.00040 | 621.9                          | 11.0 | 650.2                          | 14.0  | 276        | 211         | 1.31          |
| LAV14_11 | 1.78400        | 0.04200 | 0.17100        | 0.00320 | 5.84795        | 0.10944 | 0.07502         | 0.00051 | 1017.6                         | 18.0 | 1068.9                         | 14.0  | 712        | 143         | 4.99          |
| LAV14_12 | 0.60750        | 0.01400 | 0.07654        | 0.00130 | 13.06506       | 0.22190 | 0.05747         | 0.00042 | 475.4                          | 7.8  | 510.0                          | 16.0  | 1082       | 999         | 1.08          |
| LAV14_13 | 0.81700        | 0.03200 | 0.09060        | 0.00320 | 11.03753       | 0.38985 | 0.06560         | 0.00051 | 559.0                          | 19.0 | 794.0                          | 16.0  | 741        | 191         | 3.88          |
| LAV14_14 | 0.90800        | 0.02900 | 0.10520        | 0.00210 | 9.50570        | 0.18975 | 0.06272         | 0.00081 | 644.7                          | 13.0 | 698.0                          | 28.0  | 681        | 112         | 6.08          |
| LAV14_15 | 0.54400        | 0.01700 | 0.06880        | 0.00220 | 14.53488       | 0.46478 | 0.05741         | 0.00087 | 429.0                          | 14.0 | 506.0                          | 31.0  | 475        | 205         | 2.32          |
| LAV14_16 | 0.49200        | 0.01700 | 0.06380        | 0.00190 | 15.67398       | 0.46678 | 0.05579         | 0.00036 | 398.9                          | 11.0 | 444.0                          | 14.0  | 299        | 164         | 1.82          |
| LAV14_17 | 0.58640        | 0.01600 | 0.07260        | 0.00190 | 13.77410       | 0.36048 | 0.05830         | 0.00110 | 451.9                          | 11.0 | 539.0                          | 39.0  | 487        | 312         | 1.56          |
| LAV14_18 | 0.39390        | 0.00890 | 0.05355        | 0.00090 | 18.67414       | 0.31385 | 0.05327         | 0.00033 | 336.3                          | 5.5  | 340.0                          | 14.0  | 849        | 84          | 10.14         |
| LAV14_19 | 0.85300        | 0.02300 | 0.09930        | 0.00190 | 10.07049       | 0.19269 | 0.06230         | 0.00054 | 610.2                          | 11.0 | 684.0                          | 18.0  | 301        | 163         | 1.85          |
| LAV14_20 | 0.58270        | 0.01400 | 0.07503        | 0.00140 | 13.32800       | 0.24869 | 0.05680         | 0.00041 | 466.4                          | 8.3  | 484.0                          | 16.0  | 445        | 276         | 1.61          |
| LAV14_21 | 0.73900        | 0.02400 | 0.09180        | 0.00260 | 10.89325       | 0.30852 | 0.05867         | 0.00035 | 566.0                          | 15.0 | 554.8                          | 13.0  | 508        | 333         | 1.53          |
| LAV14_22 | 0.63700        | 0.01500 | 0.08123        | 0.00160 | 12.31072       | 0.24249 | 0.05711         | 0.00037 | 503.5                          | 9.3  | 495.6                          | 14.0  | 572        | 52          | 10.98         |
| LAV14_23 | 1.06500        | 0.03500 | 0.11400        | 0.00290 | 8.77193        | 0.22315 | 0.06799         | 0.00056 | 696.0                          | 17.0 | 868.0                          | 17.0  | 337        | 168         | 2.01          |
| LAV14_24 | 0.74100        | 0.01700 | 0.09030        | 0.00150 | 11.07420       | 0.18396 | 0.05981         | 0.00034 | 557.3                          | 8.9  | 596.6                          | 12.0  | 613        | 81          | 7.61          |
| LAV14_25 | 0.60860        | 0.01500 | 0.07716        | 0.00130 | 12.96008       | 0.21835 | 0.05748         | 0.00038 | 479.1                          | 7.8  | 509.9                          | 14.0  | 657        | 267         | 2.46          |
| LAV14_27 | 0.40190        | 0.00970 | 0.05465        | 0.00092 | 18.29826       | 0.30804 | 0.05331         | 0.00046 | 343.0                          | 5.6  | 342.0                          | 19.0  | 158        | 109         | 1.45          |
| LAV14_28 | 1.65400        | 0.07100 | 0.15820        | 0.00620 | 6.32111        | 0.24773 | 0.07651         | 0.00042 | 947.0                          | 35.0 | 1108.4                         | 11.0  | 723        | 209         | 3.46          |
| LAV14_29 | 0.60400        | 0.06600 | 0.07440        | 0.00430 | 13.44086       | 0.77682 | 0.06250         | 0.00390 | 462.0                          | 26.0 | 680.0                          | 120.0 | 1440       | 180         | 8.00          |
| LAV14_30 | 0.63800        | 0.02400 | 0.07970        | 0.00310 | 12.54705       | 0.48803 | 0.05879         | 0.00045 | 494.0                          | 18.0 | 559.0                          | 17.0  | 1490       | 833         | 1.79          |
| LAV14_31 | 1.41800        | 0.09400 | 0.14260        | 0.00820 | 7.01262        | 0.40325 | 0.07208         | 0.00063 | 859.0                          | 46.0 | 988.0                          | 18.0  | 551        | 166         | 3.32          |
| LAV14_32 | 1.48400        | 0.03500 | 0.15306        | 0.00270 | 6.53339        | 0.11525 | 0.07044         | 0.00041 | 918.1                          | 15.0 | 941.2                          | 12.0  | 362        | 35          | 10.21         |

|          |         |         |         |         |          |         |         |         |        |      |        |       |      |      |       |
|----------|---------|---------|---------|---------|----------|---------|---------|---------|--------|------|--------|-------|------|------|-------|
| LAV14_33 | 0.82200 | 0.03000 | 0.09760 | 0.00340 | 10.24590 | 0.35693 | 0.06108 | 0.00035 | 600.0  | 20.0 | 641.9  | 12.0  | 363  | 264  | 1.37  |
| LAV14_34 | 1.97400 | 0.06100 | 0.19010 | 0.00470 | 5.26039  | 0.13006 | 0.07496 | 0.00045 | 1122.0 | 26.0 | 1067.3 | 12.0  | 265  | 143  | 1.85  |
| LAV14_35 | 0.69500 | 0.01900 | 0.08220 | 0.00280 | 12.16545 | 0.41439 | 0.06170 | 0.00100 | 509.0  | 17.0 | 662.0  | 35.0  | 1014 | 298  | 3.40  |
| LAV14_36 | 0.61660 | 0.01700 | 0.07660 | 0.00180 | 13.05483 | 0.30677 | 0.05874 | 0.00048 | 475.8  | 11.0 | 557.0  | 18.0  | 354  | 200  | 1.77  |
| LAV14_37 | 1.37500 | 0.05800 | 0.13220 | 0.00570 | 7.56430  | 0.32615 | 0.07561 | 0.00063 | 800.0  | 32.0 | 1085.0 | 17.0  | 472  | 157  | 3.01  |
| LAV14_38 | 1.98200 | 0.05100 | 0.19090 | 0.00440 | 5.23835  | 0.12074 | 0.07591 | 0.00046 | 1126.0 | 24.0 | 1092.7 | 12.0  | 233  | 111  | 2.10  |
| LAV14_39 | 0.87200 | 0.02700 | 0.10000 | 0.00240 | 10.00000 | 0.24000 | 0.06270 | 0.00110 | 614.0  | 14.0 | 696.0  | 36.0  | 546  | 214  | 2.55  |
| LAV14_40 | 0.48300 | 0.04900 | 0.05620 | 0.00480 | 17.79359 | 1.51974 | 0.06230 | 0.00120 | 352.0  | 29.0 | 695.0  | 35.0  | 770  | 52   | 14.72 |
| LAV14_41 | 0.68200 | 0.02900 | 0.08330 | 0.00330 | 12.00480 | 0.47558 | 0.05956 | 0.00033 | 516.0  | 20.0 | 587.5  | 12.0  | 755  | 115  | 6.57  |
| LAV14_42 | 0.45300 | 0.01000 | 0.05978 | 0.00100 | 16.72800 | 0.27983 | 0.05554 | 0.00041 | 374.3  | 6.1  | 434.0  | 16.0  | 1462 | 1041 | 1.40  |
| LAV14_43 | 0.72200 | 0.01900 | 0.09050 | 0.00220 | 11.04972 | 0.26861 | 0.05798 | 0.00032 | 558.4  | 13.0 | 529.1  | 12.0  | 518  | 170  | 3.05  |
| LAV14_44 | 0.62400 | 0.01900 | 0.07720 | 0.00200 | 12.95337 | 0.33558 | 0.05877 | 0.00031 | 479.6  | 12.0 | 558.5  | 12.0  | 1400 | 454  | 3.08  |
| LAV14_45 | 2.02900 | 0.07200 | 0.19020 | 0.00450 | 5.25762  | 0.12439 | 0.07710 | 0.00110 | 1122.0 | 24.0 | 1123.0 | 29.0  | 379  | 210  | 1.81  |
| LAV14_46 | 0.70000 | 0.02100 | 0.08430 | 0.00180 | 11.86240 | 0.25329 | 0.06085 | 0.00057 | 522.0  | 11.0 | 634.0  | 20.0  | 269  | 95   | 2.82  |
| LAV14_47 | 0.61600 | 0.02700 | 0.07300 | 0.00230 | 13.69863 | 0.43160 | 0.06140 | 0.00120 | 454.0  | 14.0 | 650.0  | 41.0  | 585  | 261  | 2.24  |
| LAV14_48 | 0.66550 | 0.01600 | 0.07844 | 0.00140 | 12.74860 | 0.22754 | 0.06182 | 0.00041 | 486.8  | 8.2  | 667.8  | 14.0  | 928  | 250  | 3.71  |
| LAV14_49 | 0.90900 | 0.07000 | 0.10230 | 0.00570 | 9.77517  | 0.54466 | 0.06450 | 0.00210 | 628.0  | 34.0 | 757.0  | 67.0  | 1023 | 64   | 15.98 |
| LAV14_50 | 0.43400 | 0.03900 | 0.05180 | 0.00200 | 19.30502 | 0.74537 | 0.06040 | 0.00350 | 326.0  | 12.0 | 610.0  | 120.0 | 320  | 14   | 22.70 |
| LAV14_51 | 0.89180 | 0.02100 | 0.10580 | 0.00180 | 9.45180  | 0.16081 | 0.06128 | 0.00040 | 648.3  | 10.0 | 649.0  | 14.0  | 381  | 203  | 1.88  |
| LAV14_52 | 0.57730 | 0.01400 | 0.07443 | 0.00150 | 13.43544 | 0.27077 | 0.05665 | 0.00036 | 462.8  | 8.9  | 477.9  | 14.0  | 1106 | 844  | 1.31  |
| LAV14_53 | 0.70400 | 0.03500 | 0.07590 | 0.00550 | 13.17523 | 0.95473 | 0.06660 | 0.00140 | 472.0  | 33.0 | 825.0  | 44.0  | 700  | 195  | 3.59  |
| LAV14_54 | 0.45100 | 0.02500 | 0.05340 | 0.00310 | 18.72659 | 1.08712 | 0.06142 | 0.00057 | 335.0  | 19.0 | 654.0  | 20.0  | 586  | 160  | 3.66  |
| LAV14_55 | 1.42800 | 0.07900 | 0.14030 | 0.00780 | 7.12758  | 0.39626 | 0.07375 | 0.00067 | 846.0  | 44.0 | 1034.0 | 18.0  | 376  | 107  | 3.52  |
| LAV14_56 | 0.41800 | 0.02100 | 0.03250 | 0.00230 | 30.76923 | 2.17752 | 0.09500 | 0.00470 | 206.0  | 15.0 | 1512.0 | 93.0  | 980  | 480  | 2.04  |
| LAV14_57 | 0.87900 | 0.02300 | 0.10700 | 0.00220 | 9.34579  | 0.19216 | 0.05996 | 0.00050 | 655.4  | 13.0 | 602.0  | 18.0  | 106  | 211  | 0.50  |
| LAV14_58 | 0.44640 | 0.01100 | 0.05631 | 0.00130 | 17.75884 | 0.40999 | 0.05780 | 0.00130 | 353.2  | 8.2  | 522.0  | 49.0  | 228  | 247  | 0.92  |
| LAV14_59 | 0.87200 | 0.02000 | 0.10398 | 0.00180 | 9.61723  | 0.16648 | 0.06109 | 0.00038 | 637.7  | 11.0 | 644.4  | 14.0  | 370  | 127  | 2.91  |
