# Supplementary material
Source: publisher figshare collection journal article supplement (https://tandf.figshare.com/articles/dataset/_/5630188)
Supplement: Supplementary file 4 [file 1]

**Supplementary Table 1. Detrital zircon LA-MC-ICPMS U-Pb data of CA15-11, CA15-13, and CA15-26 metapelites (host rocks).**

| CA15-11   |                |         |                |         |                |         |                 |         |                                |      |                                |       |            |             |               |
|-----------|----------------|---------|----------------|---------|----------------|---------|-----------------|---------|--------------------------------|------|--------------------------------|-------|------------|-------------|---------------|
| Spot      | 207Pb/<br>235U | 2σ      | 206Pb/<br>238U | 2σ      | 238U/<br>206Pb | 2σ      | 207Pb/<br>206Pb | 2σ      | 206Pb/<br>238Pb<br>Age<br>(Ma) | 2σ   | 207Pb/<br>206Pb<br>Age<br>(Ma) | 2σ    | U<br>(ppm) | Th<br>(ppm) | U/Th<br>Ratio |
| Ca1511_0  | 0.47500        | 0.01900 | 0.05470        | 0.00180 | 18.28154       | 0.60159 | 0.06290         | 0.00160 | 343.2                          | 11.0 | 701.0                          | 55.0  | 217        | 96          | 2.26          |
| Ca1511_1  | 0.39200        | 0.01400 | 0.04608        | 0.00120 | 21.70139       | 0.56514 | 0.06140         | 0.00220 | 290.4                          | 7.6  | 650.0                          | 74.0  | 811        | 269         | 3.01          |
| Ca1511_2  | 0.65480        | 0.01500 | 0.08186        | 0.00200 | 12.21598       | 0.29846 | 0.05766         | 0.00073 | 507.2                          | 12.0 | 515.0                          | 28.0  | 136        | 68          | 2.00          |
| Ca1511_3  | 0.49000        | 0.01000 | 0.05592        | 0.00150 | 17.88269       | 0.47969 | 0.06351         | 0.00071 | 350.8                          | 8.9  | 724.0                          | 24.0  | 723        | 280         | 2.58          |
| Ca1511_4  | 0.68100        | 0.02600 | 0.05970        | 0.00260 | 16.75042       | 0.72950 | 0.08190         | 0.00210 | 374.0                          | 16.0 | 1237.0                         | 49.0  | 284        | 288         | 0.99          |
| Ca1511_5  | 1.44000        | 0.11000 | 0.12430        | 0.00910 | 8.04505        | 0.58898 | 0.08405         | 0.00110 | 755.0                          | 52.0 | 1293.0                         | 26.0  | 224        | 51          | 4.39          |
| Ca1511_6  | 1.75900        | 0.03600 | 0.17150        | 0.00430 | 5.83090        | 0.14620 | 0.07426         | 0.00078 | 1020.5                         | 23.0 | 1047.6                         | 21.0  | 268        | 77          | 3.48          |
| Ca1511_7  | 0.71460        | 0.01500 | 0.08640        | 0.00230 | 11.57407       | 0.30811 | 0.05992         | 0.00064 | 534.2                          | 14.0 | 599.5                          | 23.0  | 474        | 105         | 4.51          |
| Ca1511_8  | 0.73130        | 0.01400 | 0.09069        | 0.00220 | 11.02657       | 0.26749 | 0.05820         | 0.00059 | 559.6                          | 13.0 | 536.5                          | 22.0  | 626        | 274         | 2.28          |
| Ca1511_9  | 2.20500        | 0.04300 | 0.20421        | 0.00490 | 4.89692        | 0.11750 | 0.07859         | 0.00110 | 1197.9                         | 26.0 | 1161.0                         | 28.0  | 91         | 30          | 3.03          |
| Ca1511_10 | 1.41800        | 0.06800 | 0.13910        | 0.00680 | 7.18907        | 0.35144 | 0.07372         | 0.00077 | 839.0                          | 39.0 | 1032.7                         | 21.0  | 242        | 72          | 3.36          |
| Ca1511_11 | 1.29400        | 0.05100 | 0.11530        | 0.00450 | 8.67303        | 0.33850 | 0.08100         | 0.00180 | 703.0                          | 26.0 | 1220.0                         | 46.0  | 310        | 59          | 5.25          |
| Ca1511_12 | 0.43680        | 0.01200 | 0.05818        | 0.00160 | 17.18804       | 0.47269 | 0.05447         | 0.00084 | 364.5                          | 9.9  | 389.0                          | 35.0  | 221        | 182         | 1.21          |
| Ca1511_13 | 0.64980        | 0.01300 | 0.08170        | 0.00190 | 12.23990       | 0.28465 | 0.05759         | 0.00066 | 506.2                          | 12.0 | 513.0                          | 25.0  | 282        | 151         | 1.87          |
| Ca1511_14 | 0.60490        | 0.01200 | 0.07644        | 0.00190 | 13.08216       | 0.32517 | 0.05719         | 0.00063 | 474.8                          | 11.0 | 498.0                          | 24.0  | 103        | 158         | 0.65          |
| Ca1511_15 | 0.46400        | 0.02400 | 0.04976        | 0.00150 | 20.09646       | 0.60580 | 0.06790         | 0.00340 | 313.1                          | 9.0  | 854.0                          | 97.0  | 516        | 141         | 3.66          |
| Ca1511_16 | 4.78600        | 0.10000 | 0.31650        | 0.00800 | 3.15956        | 0.07986 | 0.10966         | 0.00120 | 1775.0                         | 41.0 | 1792.8                         | 20.0  | 40         | 38          | 1.05          |
| Ca1511_17 | 0.56000        | 0.01600 | 0.07060        | 0.00220 | 14.16431       | 0.44138 | 0.05744         | 0.00063 | 440.0                          | 13.0 | 507.0                          | 24.0  | 449        | 746         | 0.60          |
| Ca1511_18 | 1.97000        | 0.14000 | 0.16800        | 0.01600 | 5.95238        | 0.56689 | 0.08250         | 0.00260 | 1029.0                         | 72.0 | 1251.0                         | 66.0  | 498        | 240         | 2.08          |
| Ca1511_19 | 0.80800        | 0.07000 | 0.08350        | 0.00630 | 11.97605       | 0.90358 | 0.06970         | 0.00140 | 517.0                          | 38.0 | 924.0                          | 38.0  | 370        | 125         | 2.96          |
| Ca1511_20 | 0.57200        | 0.01500 | 0.06200        | 0.00200 | 16.12903       | 0.52029 | 0.06756         | 0.00120 | 387.8                          | 12.0 | 852.0                          | 37.0  | 492        | 124         | 3.97          |
| Ca1511_21 | 0.50770        | 0.01100 | 0.06038        | 0.00170 | 16.56178       | 0.46630 | 0.06073         | 0.00080 | 377.9                          | 10.0 | 628.0                          | 28.0  | 574        | 39          | 14.72         |
| Ca1511_22 | 0.40900        | 0.02300 | 0.04260        | 0.00170 | 23.47418       | 0.93676 | 0.06990         | 0.00380 | 268.8                          | 10.0 | 910.0                          | 110.0 | 269        | 85          | 3.16          |
| Ca1511_23 | 0.48710        | 0.01100 | 0.06030        | 0.00210 | 16.58375       | 0.57754 | 0.05790         | 0.00160 | 377.1                          | 13.0 | 521.0                          | 65.0  | 820        | 288         | 2.85          |
| Ca1511_24 | 0.51530        | 0.01100 | 0.06655        | 0.00160 | 15.02630       | 0.36126 | 0.05599         | 0.00066 | 415.3                          | 10.0 | 451.0                          | 26.0  | 383        | 50          | 7.66          |
| Ca1511_25 | 0.38060        | 0.00790 | 0.05453        | 0.00130 | 18.33853       | 0.43719 | 0.05062         | 0.00064 | 342.3                          | 8.1  | 222.0                          | 29.0  | 110        | 27          | 4.07          |
| Ca1511_26 | 0.47490        | 0.01300 | 0.05876        | 0.00160 | 17.01838       | 0.46340 | 0.05918         | 0.00076 | 368.1                          | 9.5  | 572.0                          | 28.0  | 502        | 149         | 3.37          |
| Ca1511_27 | 0.62040        | 0.01300 | 0.07710        | 0.00230 | 12.97017       | 0.38692 | 0.05900         | 0.00081 | 478.8                          | 14.0 | 572.0                          | 33.0  | 369        | 158         | 2.34          |
| Ca1511_28 | 0.92600        | 0.02300 | 0.10710        | 0.00290 | 9.33707        | 0.25282 | 0.06199         | 0.00075 | 656.1                          | 17.0 | 673.0                          | 26.0  | 740        | 186         | 3.98          |
| Ca1511_29 | 0.51600        | 0.02400 | 0.05860        | 0.00190 | 17.06485       | 0.55330 | 0.06350         | 0.00150 | 367.3                          | 11.0 | 720.0                          | 49.0  | 448        | 57          | 7.86          |

|           |         |         |         |         |          |         |         |         |        |      |        |      |     |     |       |
|-----------|---------|---------|---------|---------|----------|---------|---------|---------|--------|------|--------|------|-----|-----|-------|
| Ca1511_30 | 2.14300 | 0.04700 | 0.20680 | 0.00540 | 4.83559  | 0.12627 | 0.07566 | 0.00079 | 1212.0 | 29.0 | 1085.0 | 21.0 | 162 | 123 | 1.32  |
| Ca1511_31 | 1.98000 | 0.06000 | 0.19220 | 0.00670 | 5.20291  | 0.18137 | 0.07480 | 0.00077 | 1133.0 | 36.0 | 1062.2 | 21.0 | 121 | 48  | 2.52  |
| Ca1511_32 | 2.01190 | 0.03800 | 0.19180 | 0.00470 | 5.21376  | 0.12776 | 0.07594 | 0.00085 | 1130.9 | 25.0 | 1092.0 | 22.0 | 336 | 162 | 2.07  |
| Ca1511_33 | 0.76280 | 0.01500 | 0.08579 | 0.00220 | 11.65637 | 0.29892 | 0.06422 | 0.00078 | 530.6  | 13.0 | 748.0  | 26.0 | 710 | 94  | 7.55  |
| Ca1511_34 | 0.45750 | 0.00930 | 0.06121 | 0.00150 | 16.33720 | 0.40036 | 0.05433 | 0.00067 | 383.0  | 8.9  | 383.0  | 28.0 | 217 | 103 | 2.11  |
| Ca1511_35 | 0.62300 | 0.01700 | 0.07650 | 0.00240 | 13.07190 | 0.41010 | 0.05922 | 0.00100 | 475.4  | 14.0 | 573.0  | 38.0 | 130 | 123 | 1.06  |
| Ca1511_36 | 1.00360 | 0.02100 | 0.10981 | 0.00280 | 9.10664  | 0.23221 | 0.06594 | 0.00069 | 671.7  | 16.0 | 803.3  | 22.0 | 575 | 73  | 7.88  |
| Ca1511_37 | 1.49100 | 0.03700 | 0.14230 | 0.00420 | 7.02741  | 0.20741 | 0.07512 | 0.00078 | 857.0  | 24.0 | 1070.6 | 21.0 | 273 | 198 | 1.38  |
| Ca1511_38 | 0.49670 | 0.00990 | 0.06590 | 0.00160 | 15.17451 | 0.36843 | 0.05461 | 0.00057 | 411.4  | 9.8  | 395.2  | 24.0 | 457 | 179 | 2.55  |
| Ca1511_39 | 1.51600 | 0.03400 | 0.15440 | 0.00410 | 6.47668  | 0.17198 | 0.07079 | 0.00072 | 925.0  | 23.0 | 950.3  | 21.0 | 455 | 92  | 4.95  |
| Ca1511_40 | 0.57500 | 0.02400 | 0.06370 | 0.00280 | 15.69859 | 0.69005 | 0.06550 | 0.00082 | 398.0  | 17.0 | 789.0  | 26.0 | 382 | 183 | 2.09  |
| Ca1511_41 | 1.91300 | 0.04300 | 0.17770 | 0.00460 | 5.62746  | 0.14567 | 0.07739 | 0.00092 | 1054.2 | 25.0 | 1130.0 | 24.0 | 48  | 67  | 0.72  |
| Ca1511_42 | 0.47800 | 0.01300 | 0.05380 | 0.00150 | 18.58736 | 0.51824 | 0.06480 | 0.00140 | 337.8  | 9.1  | 762.0  | 44.0 | 249 | 146 | 1.71  |
| Ca1511_43 | 1.49400 | 0.04400 | 0.14260 | 0.00540 | 7.01262  | 0.26556 | 0.07666 | 0.00085 | 859.0  | 31.0 | 1111.0 | 22.0 | 511 | 220 | 2.32  |
| Ca1511_44 | 0.84040 | 0.01800 | 0.09948 | 0.00240 | 10.05227 | 0.24252 | 0.06120 | 0.00068 | 611.4  | 14.0 | 645.0  | 24.0 | 303 | 51  | 5.94  |
| Ca1511_45 | 0.78600 | 0.01600 | 0.09480 | 0.00250 | 10.54852 | 0.27818 | 0.06068 | 0.00062 | 583.6  | 15.0 | 627.1  | 22.0 | 566 | 500 | 1.13  |
| Ca1511_46 | 0.58280 | 0.01200 | 0.07403 | 0.00180 | 13.50804 | 0.32844 | 0.05675 | 0.00064 | 460.4  | 11.0 | 481.0  | 25.0 | 349 | 180 | 1.94  |
| Ca1511_47 | 0.74000 | 0.03400 | 0.08770 | 0.00450 | 11.40251 | 0.58508 | 0.06096 | 0.00068 | 542.0  | 27.0 | 637.0  | 24.0 | 680 | 270 | 2.52  |
| Ca1511_48 | 0.76880 | 0.01700 | 0.09402 | 0.00240 | 10.63603 | 0.27150 | 0.05909 | 0.00061 | 579.3  | 14.0 | 569.6  | 22.0 | 539 | 100 | 5.39  |
| Ca1511_49 | 0.54810 | 0.01300 | 0.06360 | 0.00170 | 15.72327 | 0.42028 | 0.06193 | 0.00085 | 397.4  | 10.0 | 670.0  | 29.0 | 410 | 279 | 1.47  |
| Ca1511_50 | 0.89900 | 0.03200 | 0.08560 | 0.00330 | 11.68224 | 0.45037 | 0.07587 | 0.00110 | 529.0  | 20.0 | 1090.0 | 30.0 | 324 | 213 | 1.52  |
| Ca1511_51 | 0.62700 | 0.01600 | 0.07140 | 0.00200 | 14.00560 | 0.39231 | 0.06383 | 0.00080 | 444.5  | 12.0 | 735.0  | 27.0 | 305 | 171 | 1.78  |
| Ca1511_52 | 1.51700 | 0.03900 | 0.13430 | 0.00630 | 7.44602  | 0.34929 | 0.08223 | 0.00110 | 812.0  | 36.0 | 1250.0 | 26.0 | 513 | 424 | 1.21  |
| Ca1511_53 | 0.59200 | 0.01300 | 0.07525 | 0.00190 | 13.28904 | 0.33554 | 0.05686 | 0.00063 | 467.7  | 11.0 | 485.0  | 24.0 | 402 | 205 | 1.96  |
| Ca1511_54 | 0.40300 | 0.01300 | 0.05129 | 0.00130 | 19.49698 | 0.49417 | 0.05700 | 0.00150 | 322.4  | 8.1  | 488.0  | 57.0 | 195 | 45  | 4.33  |
| Ca1511_55 | 0.64300 | 0.03900 | 0.06950 | 0.00370 | 14.38849 | 0.76601 | 0.06600 | 0.00170 | 433.0  | 23.0 | 800.0  | 48.0 | 519 | 102 | 5.09  |
| Ca1511_56 | 0.66500 | 0.02600 | 0.07700 | 0.00330 | 12.98701 | 0.55659 | 0.06214 | 0.00066 | 478.0  | 20.0 | 677.8  | 23.0 | 960 | 220 | 4.36  |
| Ca1511_57 | 0.93100 | 0.04500 | 0.09510 | 0.00570 | 10.51525 | 0.63025 | 0.07221 | 0.00100 | 586.0  | 33.0 | 991.0  | 29.0 | 381 | 122 | 3.12  |
| Ca1511_58 | 0.86800 | 0.02700 | 0.09755 | 0.00240 | 10.25115 | 0.25221 | 0.06470 | 0.00170 | 600.0  | 14.0 | 761.0  | 56.0 | 611 | 495 | 1.23  |
| Ca1511_59 | 0.82990 | 0.01600 | 0.09247 | 0.00220 | 10.81432 | 0.25729 | 0.06521 | 0.00070 | 570.1  | 13.0 | 780.2  | 23.0 | 757 | 65  | 11.65 |

| CA15-13    |                |         |                |         |                |         |                 |         |                                |      |                                |       |            |             |               |
|------------|----------------|---------|----------------|---------|----------------|---------|-----------------|---------|--------------------------------|------|--------------------------------|-------|------------|-------------|---------------|
| Spot       | 207Pb/<br>235U |         | 206Pb/<br>238U |         | 238U/<br>206Pb |         | 207Pb/<br>206Pb |         | 206Pb/<br>238Pb<br>Age<br>(Ma) |      | 207Pb/<br>206Pb<br>Age<br>(Ma) |       | U<br>(ppm) | Th<br>(ppm) | U/Th<br>Ratio |
| CA15_13_1  | 3.02200        | 0.08000 | 0.23600        | 0.00580 | 4.23729        | 0.10414 | 0.0934          | 0.0012  | 1366.0                         | 31.0 | 1494.0                         | 24.0  | 194        | 82          | 2.37          |
| CA15_13_2  | 0.44660        | 0.01100 | 0.05917        | 0.00150 | 16.90046       | 0.42844 | 0.05462         | 0.00032 | 370.5                          | 9.0  | 396.6                          | 13.0  | 385        | 419         | 0.92          |
| CA15_13_3  | 0.49980        | 0.01400 | 0.06553        | 0.00170 | 15.26019       | 0.39588 | 0.05532         | 0.0004  | 409.2                          | 10.0 | 425.0                          | 16.0  | 241        | 240         | 1.00          |
| CA15_13_4  | 0.75190        | 0.01900 | 0.09137        | 0.00220 | 10.94451       | 0.26352 | 0.05976         | 0.00039 | 563.6                          | 13.0 | 595.0                          | 14.0  | 267        | 734         | 0.36          |
| CA15_13_5  | 1.85100        | 0.04900 | 0.17910        | 0.00480 | 5.58347        | 0.14964 | 0.07504         | 0.00041 | 1062.0                         | 26.0 | 1069.6                         | 11.0  | 483        | 535         | 0.90          |
| CA15_13_6  | 0.73700        | 0.02800 | 0.09120        | 0.00320 | 10.96491       | 0.38473 | 0.05903         | 0.00035 | 562.4                          | 18.0 | 567.9                          | 13.0  | 399        | 117         | 3.41          |
| CA15_13_7  | 0.52400        | 0.01800 | 0.06706        | 0.00190 | 14.91202       | 0.42250 | 0.05648         | 0.0007  | 418.4                          | 12.0 | 469.0                          | 27.0  | 486        | 246         | 1.98          |
| CA15_13_9  | 1.86400        | 0.04900 | 0.17780        | 0.00480 | 5.62430        | 0.15184 | 0.07567         | 0.00038 | 1055.0                         | 26.0 | 1086.1                         | 10.0  | 67         | 32          | 2.07          |
| CA15_13_11 | 0.63600        | 0.03100 | 0.06600        | 0.00310 | 15.15152       | 0.71166 | 0.0702          | 0.0011  | 412.0                          | 19.0 | 931.0                          | 31.0  | 306        | 277         | 1.10          |
| CA15_13_12 | 0.39700        | 0.01200 | 0.05279        | 0.00180 | 18.94298       | 0.64591 | 0.05424         | 0.00037 | 331.6                          | 11.0 | 380.0                          | 15.0  | 522        | 222         | 2.35          |
| CA15_13_13 | 0.51050        | 0.01400 | 0.06687        | 0.00180 | 14.95439       | 0.40254 | 0.0552          | 0.00029 | 417.2                          | 11.0 | 419.9                          | 12.0  | 163        | 63          | 2.60          |
| CA15_13_14 | 0.68900        | 0.01900 | 0.08588        | 0.00240 | 11.64415       | 0.32541 | 0.05788         | 0.00031 | 531.1                          | 14.0 | 525.1                          | 12.0  | 196        | 43          | 4.53          |
| CA15_13_15 | 0.43110        | 0.01200 | 0.05820        | 0.00160 | 17.18213       | 0.47236 | 0.05361         | 0.00038 | 364.6                          | 9.6  | 354.0                          | 16.0  | 87         | 50          | 1.74          |
| CA15_13_16 | 0.42000        | 0.01400 | 0.04420        | 0.00140 | 22.62443       | 0.71661 | 0.069           | 0.0012  | 278.9                          | 8.9  | 892.0                          | 37.0  | 310        | 161         | 1.93          |
| CA15_13_17 | 0.63000        | 0.04600 | 0.06327        | 0.00210 | 15.80528       | 0.52459 | 0.0718          | 0.0042  | 395.5                          | 13.0 | 940.0                          | 110.0 | 192        | 161         | 1.19          |
| CA15_13_18 | 0.51500        | 0.07200 | 0.07660        | 0.00250 | 13.05483       | 0.42607 | 0.0482          | 0.0058  | 475.5                          | 15.0 | 130.0                          | 230.0 | 402        | 98          | 4.10          |
| CA15_13_19 | 2.05400        | 0.06300 | 0.18740        | 0.00580 | 5.33618        | 0.16515 | 0.07938         | 0.00037 | 1107.0                         | 31.0 | 1181.6                         | 9.1   | 198        | 28          | 7.01          |
| CA15_13_21 | 2.43500        | 0.06300 | 0.21960        | 0.00570 | 4.55373        | 0.11820 | 0.08005         | 0.00036 | 1279.0                         | 30.0 | 1198.3                         | 8.9   | 82.4       | 86.7        | 0.95          |
| CA15_13_22 | 0.39710        | 0.01100 | 0.05333        | 0.00140 | 18.75117       | 0.49225 | 0.05348         | 0.00039 | 334.9                          | 8.6  | 351.0                          | 17.0  | 103        | 155         | 0.66          |
| CA15_13_23 | 0.72700        | 0.02900 | 0.08970        | 0.00350 | 11.14827       | 0.43499 | 0.05913         | 0.00038 | 554.0                          | 20.0 | 572.0                          | 14.0  | 269        | 230         | 1.17          |
| CA15_13_24 | 0.49690        | 0.01600 | 0.06520        | 0.00220 | 15.33742       | 0.51752 | 0.05543         | 0.00032 | 407.1                          | 14.0 | 429.3                          | 13.0  | 98         | 72          | 1.35          |
| CA15_13_25 | 1.35900        | 0.03500 | 0.13464        | 0.00350 | 7.42721        | 0.19307 | 0.07341         | 0.00037 | 814.3                          | 20.0 | 1025.2                         | 10.0  | 220        | 116         | 1.89          |
| CA15_13_26 | 0.44120        | 0.01200 | 0.04939        | 0.00140 | 20.24701       | 0.57392 | 0.0647          | 0.0011  | 310.8                          | 8.8  | 759.0                          | 35.0  | 423        | 83          | 5.08          |
| CA15_13_27 | 0.39000        | 0.02600 | 0.04780        | 0.00250 | 20.92050       | 1.09417 | 0.0583          | 0.0017  | 301.0                          | 15.0 | 526.0                          | 65.0  | 207        | 116         | 1.78          |
| CA15_13_28 | 2.61900        | 0.07200 | 0.22200        | 0.00620 | 4.50451        | 0.12580 | 0.08556         | 0.00041 | 1292.5                         | 33.0 | 1328.2                         | 9.3   | 161        | 110         | 1.46          |
| CA15_13_29 | 0.42000        | 0.01200 | 0.05579        | 0.00180 | 17.92436       | 0.57831 | 0.05467         | 0.00048 | 350.3                          | 11.0 | 398.0                          | 19.0  | 277        | 229         | 1.21          |
| CA15_13_30 | 0.56000        | 0.07100 | 0.05930        | 0.00290 | 16.86341       | 0.82469 | 0.069           | 0.0045  | 371.0                          | 18.0 | 840.0                          | 140.0 | 640        | 72.4        | 8.84          |
| CA15_13_33 | 0.56500        | 0.02200 | 0.07160        | 0.00200 | 13.96648       | 0.39013 | 0.0543          | 0.0026  | 445.8                          | 12.0 | 370.0                          | 110.0 | 510        | 162         | 3.15          |
| CA15_13_34 | 0.91500        | 0.02800 | 0.09960        | 0.00280 | 10.04016       | 0.28225 | 0.0663          | 0.00048 | 612.0                          | 17.0 | 816.0                          | 15.0  | 368        | 80          | 4.61          |
| CA15_13_35 | 0.36160        | 0.01300 | 0.04561        | 0.00140 | 21.92502       | 0.67299 | 0.05796         | 0.00078 | 287.5                          | 8.3  | 529.0                          | 30.0  | 890        | 108         | 8.24          |
| CA15_13_36 | 0.62500        | 0.02800 | 0.07960        | 0.00320 | 12.56281       | 0.50504 | 0.0553          | 0.0015  | 493.4                          | 19.0 | 437.0                          | 49.0  | 680        | 216         | 3.15          |
| CA15_13_37 | 0.41890        | 0.01300 | 0.05609        | 0.00180 | 17.82849       | 0.57214 | 0.05394         | 0.00029 | 351.8                          | 11.0 | 368.1                          | 12.0  | 284        | 121         | 2.35          |

|            |         |         |         |         |          |         |         |         |        |      |        |       |     |     |      |
|------------|---------|---------|---------|---------|----------|---------|---------|---------|--------|------|--------|-------|-----|-----|------|
| CA15_13_38 | 0.56510 | 0.01400 | 0.07203 | 0.00190 | 13.88310 | 0.36621 | 0.05649 | 0.00031 | 448.4  | 11.0 | 473.5  | 11.0  | 457 | 395 | 1.16 |
| CA15_13_39 | 0.92040 | 0.02600 | 0.10839 | 0.00310 | 9.22594  | 0.26387 | 0.06159 | 0.00035 | 663.4  | 18.0 | 659.5  | 12.0  | 217 | 177 | 1.23 |
| CA15_13_31 | 4.28000 | 0.42000 | 0.30380 | 0.01000 | 3.29164  | 0.10835 | 0.1009  | 0.0095  | 1709.0 | 50.0 | 1520.0 | 290.0 | 206 | 71  | 2.90 |

| CA15-26   |                |         |                |         |                |         |                 |         | 206Pb/<br>238Pb |     | 207Pb/<br>206Pb |    |            |             |               |
|-----------|----------------|---------|----------------|---------|----------------|---------|-----------------|---------|-----------------|-----|-----------------|----|------------|-------------|---------------|
| Spot      | 207Pb/<br>235U | 2σ      | 206Pb/<br>238U | 2σ      | 238U/<br>206Pb | 2σ      | 207Pb/<br>206Pb | 2σ      | Age<br>(Ma)     | 2σ  | Age<br>(Ma)     | 2σ | U<br>(ppm) | Th<br>(ppm) | U/Th<br>Ratio |
| CA1526_0  | 0.49700        | 0.02500 | 0.05629        | 0.00140 | 17.76514       | 0.44184 | 0.06300         | 0.00250 | 353             | 8.8 | 697             | 77 | 391        | 50          | 7.82          |
| CA1526_1  | 9.42000        | 0.35000 | 0.39910        | 0.00830 | 2.50564        | 0.05211 | 0.17318         | 0.00350 | 2165            | 38  | 2587.8          | 34 | 127        | 54          | 2.35          |
| CA1526_2  | 0.58800        | 0.02100 | 0.06985        | 0.00150 | 14.31639       | 0.30744 | 0.06180         | 0.00160 | 435.2           | 9.3 | 664             | 55 | 519        | 325         | 1.60          |
| CA1526_3  | 0.47050        | 0.01500 | 0.06089        | 0.00120 | 16.42306       | 0.32366 | 0.05530         | 0.00110 | 381             | 7.1 | 423.2           | 45 | 497        | 19          | 26.16         |
| CA1526_4  | 0.46140        | 0.01700 | 0.05814        | 0.00120 | 17.19986       | 0.35500 | 0.05860         | 0.00160 | 364.3           | 7.4 | 550             | 58 | 206        | 1           | 206.00        |
| CA1526_5  | 1.10500        | 0.03700 | 0.11270        | 0.00240 | 8.87311        | 0.18896 | 0.07029         | 0.00150 | 688.2           | 14  | 935             | 42 | 277        | 37          | 7.49          |
| CA1526_6  | 1.55900        | 0.05700 | 0.14920        | 0.00320 | 6.70241        | 0.14375 | 0.07566         | 0.00160 | 896.5           | 18  | 1085            | 42 | 80         | 28          | 2.86          |
| CA1526_7  | 1.86500        | 0.06100 | 0.17730        | 0.00350 | 5.64016        | 0.11134 | 0.07590         | 0.00150 | 1052.1          | 19  | 1091.5          | 40 | 104        | 49          | 2.12          |
| CA1526_8  | 0.43780        | 0.01400 | 0.05857        | 0.00110 | 17.07359       | 0.32066 | 0.05390         | 0.00110 | 366.9           | 6.9 | 365.7           | 46 | 234        | 74          | 3.16          |
| CA1526_9  | 0.64100        | 0.02100 | 0.07880        | 0.00180 | 12.69036       | 0.28988 | 0.05920         | 0.00160 | 488.9           | 11  | 561             | 49 | 197        | 59          | 3.34          |
| CA1526_10 | 0.52000        | 0.02100 | 0.06401        | 0.00140 | 15.62256       | 0.34169 | 0.05874         | 0.00150 | 400             | 8.4 | 553             | 55 | 214        | 6           | 35.67         |
| CA1526_11 | 0.75600        | 0.03100 | 0.08819        | 0.00170 | 11.33915       | 0.21858 | 0.06120         | 0.00170 | 544.8           | 10  | 641             | 54 | 183        | 88          | 2.08          |
| CA1526_12 | 0.44050        | 0.01600 | 0.05630        | 0.00150 | 17.76199       | 0.47323 | 0.05591         | 0.00120 | 353.1           | 9.3 | 453             | 45 | 306        | 20          | 15.30         |
| CA1526_13 | 0.56100        | 0.02900 | 0.05790        | 0.00160 | 17.27116       | 0.47727 | 0.06990         | 0.00310 | 363             | 9.8 | 914             | 85 | 352        | 51          | 6.90          |
| CA1526_14 | 0.63000        | 0.02300 | 0.07553        | 0.00160 | 13.23977       | 0.28047 | 0.05971         | 0.00140 | 469.4           | 9.4 | 591             | 52 | 412        | 16          | 25.75         |
| CA1526_15 | 0.46190        | 0.01700 | 0.05972        | 0.00140 | 16.74481       | 0.39254 | 0.05602         | 0.00130 | 373.9           | 8.4 | 451             | 49 | 677        | 24          | 28.21         |
| CA1526_16 | 0.59900        | 0.02500 | 0.07140        | 0.00190 | 14.00560       | 0.37270 | 0.06160         | 0.00190 | 444.6           | 11  | 654             | 64 | 95         | 2           | 47.50         |
| CA1526_17 | 0.49610        | 0.01800 | 0.06330        | 0.00160 | 15.79779       | 0.39931 | 0.05720         | 0.00170 | 395.6           | 9.4 | 480             | 53 | 104        | 0           | -             |
| CA1526_18 | 1.23200        | 0.04200 | 0.11780        | 0.00250 | 8.48896        | 0.18016 | 0.07467         | 0.00160 | 717.7           | 14  | 1058            | 42 | 301        | 28          | 10.75         |
| CA1526_19 | 1.18600        | 0.04200 | 0.12000        | 0.00260 | 8.33333        | 0.18056 | 0.07044         | 0.00140 | 730.4           | 15  | 940             | 42 | 153        | 17          | 9.00          |
| CA1526_20 | 0.86040        | 0.02800 | 0.10314        | 0.00200 | 9.69556        | 0.18801 | 0.06105         | 0.00130 | 632.8           | 12  | 640             | 44 | 123        | 65          | 1.89          |
| CA1526_21 | 0.62440        | 0.02100 | 0.07740        | 0.00150 | 12.91990       | 0.25039 | 0.05715         | 0.00120 | 480.6           | 9.3 | 496             | 47 | 177        | 17          | 10.41         |
| CA1526_22 | 0.59700        | 0.01900 | 0.07444        | 0.00140 | 13.43364       | 0.25265 | 0.05643         | 0.00120 | 462.9           | 8.6 | 468             | 45 | 362        | 24          | 15.08         |
| CA1526_23 | 1.08500        | 0.05600 | 0.10940        | 0.00480 | 9.14077        | 0.40106 | 0.06966         | 0.00160 | 669             | 28  | 921             | 43 | 159        | 23          | 6.91          |
| CA1526_24 | 1.23400        | 0.06300 | 0.11290        | 0.00420 | 8.85740        | 0.32950 | 0.07740         | 0.00190 | 693             | 25  | 1120            | 32 | 391        | 29          | 13.48         |
| CA1526_25 | 1.13600        | 0.04700 | 0.11730        | 0.00370 | 8.52515        | 0.26891 | 0.06944         | 0.00140 | 715             | 22  | 910.8           | 42 | 1020       | 185         | 5.51          |
| CA1526_26 | 0.57880        | 0.01800 | 0.06767        | 0.00140 | 14.77760       | 0.30573 | 0.05921         | 0.00130 | 422.1           | 8.2 | 573             | 48 | 290        | 85          | 3.41          |
| CA1526_27 | 0.49810        | 0.01700 | 0.06043        | 0.00120 | 16.54807       | 0.32861 | 0.05735         | 0.00140 | 378.2           | 7.4 | 502             | 51 | 1425       | 82          | 17.38         |
| CA1526_28 | 0.95020        | 0.03000 | 0.10140        | 0.00200 | 9.86193        | 0.19452 | 0.06471         | 0.00130 | 622.6           | 11  | 764             | 44 | 225        | 47          | 4.79          |
| CA1526_29 | 0.59100        | 0.02500 | 0.06600        | 0.00130 | 15.15152       | 0.29844 | 0.06140         | 0.00230 | 412             | 8.2 | 648             | 76 | 762        | 6           | 127.00        |
| CA1526_30 | 0.67900        | 0.02600 | 0.07539        | 0.00160 | 13.26436       | 0.28151 | 0.06210         | 0.00180 | 468.5           | 9.3 | 673             | 60 | 838        | 292         | 2.87          |
| CA1526_31 | 0.50060        | 0.01700 | 0.06232        | 0.00120 | 16.04621       | 0.30898 | 0.05472         | 0.00130 | 389.7           | 7.2 | 398             | 53 | 336        | 89          | 3.78          |

|           |         |         |         |         |          |         |         |         |        |     |        |    |      |     |        |
|-----------|---------|---------|---------|---------|----------|---------|---------|---------|--------|-----|--------|----|------|-----|--------|
| CA1526_32 | 0.52250 | 0.01800 | 0.05830 | 0.00150 | 17.15266 | 0.44132 | 0.06100 | 0.00190 | 365.2  | 9.2 | 633    | 65 | 641  | 45  | 14.24  |
| CA1526_33 | 0.97100 | 0.05200 | 0.09440 | 0.00420 | 10.59322 | 0.47131 | 0.07143 | 0.00160 | 581    | 25  | 968    | 45 | 342  | 48  | 7.13   |
| CA1526_34 | 1.01760 | 0.03200 | 0.11242 | 0.00230 | 8.89521  | 0.18199 | 0.06425 | 0.00130 | 686.8  | 13  | 748.9  | 42 | 1022 | 241 | 4.24   |
| CA1526_35 | 1.17600 | 0.04300 | 0.11660 | 0.00300 | 8.57633  | 0.22066 | 0.06974 | 0.00150 | 711    | 17  | 919    | 44 | 867  | 135 | 6.42   |
| CA1526_36 | 0.49000 | 0.01900 | 0.05930 | 0.00150 | 16.86341 | 0.42656 | 0.05667 | 0.00130 | 371.3  | 9.4 | 477    | 52 | 715  | 4   | 178.75 |
| CA1526_37 | 0.58900 | 0.03400 | 0.06590 | 0.00240 | 15.17451 | 0.55264 | 0.06110 | 0.00210 | 411    | 14  | 635    | 66 | 227  | 19  | 11.95  |
| CA1526_38 | 0.91200 | 0.03400 | 0.07976 | 0.00160 | 12.53761 | 0.25151 | 0.08167 | 0.00190 | 494.7  | 9.3 | 1236   | 45 | 271  | 44  | 6.16   |
| CA1526_39 | 2.38400 | 0.07500 | 0.20280 | 0.00400 | 4.93097  | 0.09726 | 0.08430 | 0.00170 | 1190.5 | 21  | 1298.5 | 39 | 99   | 70  | 1.41   |
| CA1526_40 | 0.60100 | 0.02800 | 0.05573 | 0.00120 | 17.94366 | 0.38637 | 0.07490 | 0.00220 | 349.6  | 7   | 1076   | 68 | 252  | 56  | 4.50   |
| CA1526_41 | 0.58970 | 0.02000 | 0.07550 | 0.00170 | 13.24503 | 0.29823 | 0.05604 | 0.00120 | 469.2  | 10  | 452    | 47 | 153  | 212 | 0.72   |
| CA1526_42 | 1.07500 | 0.04500 | 0.10900 | 0.00310 | 9.17431  | 0.26092 | 0.07005 | 0.00150 | 667    | 18  | 929    | 43 | 456  | 57  | 8.00   |
| CA1526_43 | 0.85790 | 0.02800 | 0.08073 | 0.00170 | 12.38697 | 0.26084 | 0.07478 | 0.00180 | 500.4  | 10  | 1068   | 52 | 139  | 12  | 11.58  |
| CA1526_44 | 2.18600 | 0.07100 | 0.19560 | 0.00380 | 5.11247  | 0.09932 | 0.07935 | 0.00170 | 1151.6 | 20  | 1180   | 41 | 62   | 27  | 2.30   |
| CA1526_45 | 0.46840 | 0.01500 | 0.05971 | 0.00120 | 16.74761 | 0.33658 | 0.05590 | 0.00130 | 373.8  | 7.1 | 447    | 50 | 320  | 1   | 320.00 |
| CA1526_46 | 0.54090 | 0.01800 | 0.07030 | 0.00130 | 14.22475 | 0.26305 | 0.05513 | 0.00120 | 438    | 8.1 | 416    | 49 | 185  | 110 | 1.68   |
| CA1526_47 | 0.48800 | 0.01800 | 0.05460 | 0.00180 | 18.31502 | 0.60379 | 0.06450 | 0.00200 | 342.8  | 11  | 753    | 66 | 771  | 109 | 7.07   |
| CA1526_48 | 0.48400 | 0.01600 | 0.06357 | 0.00130 | 15.73069 | 0.32169 | 0.05490 | 0.00110 | 397.3  | 8   | 407    | 46 | 628  | 462 | 1.36   |
| CA1526_49 | 0.75120 | 0.02400 | 0.09142 | 0.00180 | 10.93853 | 0.21537 | 0.05895 | 0.00120 | 563.9  | 11  | 564.1  | 44 | 334  | 571 | 0.58   |
| CA1526_50 | 0.43450 | 0.01400 | 0.05788 | 0.00110 | 17.27713 | 0.32835 | 0.05483 | 0.00120 | 362.7  | 6.8 | 404    | 47 | 558  | 5   | 111.60 |
| CA1526_51 | 0.61500 | 0.02600 | 0.07343 | 0.00160 | 13.61841 | 0.29674 | 0.05940 | 0.00180 | 457.9  | 10  | 578    | 62 | 533  | 69  | 7.72   |
| CA1526_52 | 0.56900 | 0.02000 | 0.06760 | 0.00180 | 14.79290 | 0.39389 | 0.06045 | 0.00140 | 421.6  | 11  | 618    | 49 | 481  | 186 | 2.59   |
| CA1526_53 | 0.73300 | 0.03600 | 0.08280 | 0.00270 | 12.07729 | 0.39382 | 0.06200 | 0.00160 | 513    | 16  | 671    | 50 | 409  | 64  | 6.39   |
| CA1526_54 | 0.48350 | 0.01500 | 0.06147 | 0.00130 | 16.26810 | 0.34405 | 0.05522 | 0.00110 | 384.5  | 7.8 | 419.9  | 45 | 639  | 99  | 6.45   |
| CA1526_55 | 2.72100 | 0.08600 | 0.21608 | 0.00410 | 4.62792  | 0.08781 | 0.08738 | 0.00180 | 1261.1 | 22  | 1369.8 | 43 | 78   | 38  | 2.05   |
| CA1526_56 | 0.56340 | 0.01900 | 0.06829 | 0.00140 | 14.64343 | 0.30020 | 0.05690 | 0.00140 | 425.8  | 8.7 | 472    | 38 | 258  | 59  | 4.37   |
| CA1526_57 | 0.53600 | 0.02000 | 0.06377 | 0.00150 | 15.68135 | 0.36886 | 0.05868 | 0.00130 | 398.5  | 9   | 553    | 48 | 259  | 67  | 3.87   |
| CA1526_58 | 0.47700 | 0.01800 | 0.05624 | 0.00150 | 17.78094 | 0.47424 | 0.06010 | 0.00230 | 352.7  | 8.9 | 612    | 84 | 376  | 26  | 14.46  |
| CA1526_59 | 0.54300 | 0.02700 | 0.05890 | 0.00320 | 16.97793 | 0.92240 | 0.06701 | 0.00160 | 369    | 20  | 836    | 49 | 830  | 502 | 1.65   |
| CA1526_60 | 0.57500 | 0.02200 | 0.06806 | 0.00140 | 14.69292 | 0.30223 | 0.05880 | 0.00180 | 424.4  | 8.1 | 555    | 63 | 207  | 3   | 69.00  |
| CA1526_61 | 0.90800 | 0.04400 | 0.09720 | 0.00380 | 10.28807 | 0.40221 | 0.06597 | 0.00150 | 598    | 22  | 803    | 48 | 205  | 49  | 4.18   |
| CA1526_62 | 1.85400 | 0.06900 | 0.17410 | 0.00450 | 5.74383  | 0.14846 | 0.07533 | 0.00150 | 1035   | 25  | 1076.4 | 41 | 170  | 24  | 7.08   |
| CA1526_63 | 0.49100 | 0.01800 | 0.06250 | 0.00190 | 16.00000 | 0.48640 | 0.05552 | 0.00120 | 391    | 11  | 432    | 47 | 472  | 8   | 59.00  |
