# Supplementary material
Source: publisher figshare collection journal article supplement (https://tandf.figshare.com/articles/dataset/_/5630188)
Supplement: Supplementary file 5 [file 1]

**Supplementary Table 3. In-situ LA-MC-ICPMS thick section U-Pb data of LAV-14-5 ilmenite-bearing chloritite (blackwall).**

| Spot        | 207Pb/<br>235U |         | 206Pb/<br>238U |         | 238U/<br>206Pb |         | 207Pb/<br>206Pb |         | 206Pb/<br>238Pb<br>Age<br>(Ma) |      | 207Pb/<br>206Pb<br>Age<br>(Ma) |       | U<br>(ppm) | Th<br>(ppm) | U/Th<br>Ratio |
|-------------|----------------|---------|----------------|---------|----------------|---------|-----------------|---------|--------------------------------|------|--------------------------------|-------|------------|-------------|---------------|
| LAV-ILM_3   | 0.21000        | 0.29000 | 0.03850        | 0.00160 | 25.97403       | 1.07944 | 0.07000         | 0.01800 | 243.7                          | 9.6  | 570.0                          | 620.0 | 460        | 275         | 1.67          |
| LAV-ILM_4   | 1.31000        | 0.14000 | 0.04610        | 0.00360 | 21.69197       | 1.69395 | 0.20300         | 0.02900 | 291.0                          | 22.0 | 2660.0                         | 310.0 | 209        | 271         | 0.77          |
| LAV-ILM_5   | 0.93900        | 0.09500 | 0.05540        | 0.00290 | 18.05054       | 0.94488 | 0.12230         | 0.01000 | 347.0                          | 18.0 | 1910.0                         | 140.0 | 432        | 640         | 0.68          |
| LAV-ILM_6   | 1.05000        | 0.29000 | 0.05360        | 0.00210 | 18.65672       | 0.73095 | 0.15100         | 0.03000 | 337.0                          | 13.0 | 2290.0                         | 340.0 | 143        | 143         | 1.00          |
| LAV-ILM_7   | 0.82700        | 0.09400 | 0.05750        | 0.00180 | 17.39130       | 0.54442 | 0.09440         | 0.00460 | 360.6                          | 11.0 | 1510.0                         | 80.0  | 688        | 872         | 0.79          |
| LAV-ILM_8   | 1.24000        | 0.40000 | 0.06260        | 0.00210 | 15.97444       | 0.53588 | 0.12500         | 0.03500 | 391.0                          | 13.0 | 1550.0                         | 920.0 | 108        | 223         | 0.48          |
| LAV-ILM_9   | 0.99000        | 0.13000 | 0.04580        | 0.00270 | 21.83406       | 1.28716 | 0.14800         | 0.01600 | 288.0                          | 17.0 | 2150.0                         | 210.0 | 406        | 880         | 0.46          |
| LAV-ILM_10  | 1.45000        | 0.33000 | 0.06180        | 0.00420 | 16.18123       | 1.09970 | 0.13800         | 0.03300 | 391.0                          | 25.0 | 1820.0                         | 550.0 | 210        | 1720        | 0.12          |
| LAV-ILM_11  | 0.97000        | 0.11000 | 0.04420        | 0.00260 | 22.62443       | 1.33085 | 0.15400         | 0.01300 | 279.0                          | 16.0 | 2340.0                         | 150.0 | 361        | 209         | 1.73          |
| LAV-ILM_12  | 1.22000        | 0.14000 | 0.05380        | 0.00210 | 18.58736       | 0.72553 | 0.16600         | 0.01800 | 337.0                          | 13.0 | 2400.0                         | 170.0 | 386        | 370         | 1.04          |
| LAV-ILM_13  | 0.90000        | 0.25000 | 0.05910        | 0.00240 | 16.92047       | 0.68713 | 0.09400         | 0.01800 | 370.0                          | 14.0 | 1270.0                         | 410.0 | 470        | 920         | 0.51          |
| LAV-ILM_14  | 1.25000        | 0.32000 | 0.06030        | 0.00210 | 16.58375       | 0.57754 | 0.11100         | 0.02000 | 377.0                          | 13.0 | 1620.0                         | 360.0 | 370        | 530         | 0.70          |
| LAV-ILM_15  | 1.19000        | 0.40000 | 0.05110        | 0.00320 | 19.56947       | 1.22549 | 0.15000         | 0.03200 | 321.0                          | 20.0 | 1810.0                         | 590.0 | 370        | 530         | 0.70          |
| LAV-ILM_16  | 1.24000        | 0.11000 | 0.06340        | 0.00170 | 15.77287       | 0.42293 | 0.14000         | 0.01100 | 396.5                          | 10.0 | 2180.0                         | 140.0 | 514        | 413         | 1.24          |
| LAV-ILM_17  | 1.40000        | 0.13000 | 0.05900        | 0.00140 | 16.94915       | 0.40218 | 0.16500         | 0.01600 | 369.5                          | 8.6  | 2430.0                         | 170.0 | 266        | 224         | 1.19          |
| LAV-ILM_18  | 2.20000        | 0.20000 | 0.05560        | 0.00210 | 17.98561       | 0.67931 | 0.27800         | 0.03000 | 349.0                          | 13.0 | 3220.0                         | 240.0 | 660        | 990         | 0.67          |
| LAV-ILM_19  | 1.59000        | 0.26000 | 0.03610        | 0.00260 | 27.70083       | 1.99507 | 0.30500         | 0.05300 | 228.0                          | 16.0 | 3280.0                         | 280.0 | 300        | 241         | 1.24          |
| LAV-ILM_21  | 1.02100        | 0.07700 | 0.05580        | 0.00160 | 17.92115       | 0.51387 | 0.13720         | 0.00800 | 350.2                          | 9.9  | 2154.0                         | 97.0  | 689        | 950         | 0.73          |
| LAV-ILM_22  | 0.97000        | 0.11000 | 0.05810        | 0.00160 | 17.21170       | 0.47399 | 0.11800         | 0.01200 | 364.3                          | 9.8  | 1790.0                         | 230.0 | 442        | 720         | 0.61          |
| LAV-ILM_23  | 0.68900        | 0.03600 | 0.06180        | 0.00180 | 16.18123       | 0.47130 | 0.08020         | 0.00430 | 386.7                          | 11.0 | 1160.0                         | 140.0 | 810        | 970         | 0.84          |
| LAV-ILMb_0  | 0.52100        | 0.14000 | 0.05500        | 0.00380 | 18.10000       | 1.10000 | 0.06380         | 0.00810 | 345.0                          | 23.0 | 680.0                          | 260.0 | 540        | 317         | 1.70          |
| LAV-ILMb_2  | 0.41800        | 0.07800 | 0.05370        | 0.00340 | 18.90000       | 1.20000 | 0.05490         | 0.00250 | 337.0                          | 21.0 | 400.0                          | 96.0  | 520        | 370         | 1.41          |
| LAV-ILMb_3  | 0.66900        | 0.18000 | 0.06350        | 0.00180 | 15.68000       | 0.23000 | 0.07440         | 0.00730 | 397.1                          | 11.0 | 1043.0                         | 200.0 | 995        | 1650        | 0.60          |
| LAV-ILMb_4  | 0.30800        | 0.17000 | 0.03870        | 0.00260 | 25.90000       | 1.40000 | 0.05830         | 0.00720 | 248.0                          | 15.0 | 500.0                          | 250.0 | 170        | 78          | 2.18          |
| LAV-ILMb_5  | 0.31400        | 0.07500 | 0.04340        | 0.00290 | 23.06000       | 0.95000 | 0.05247         | 0.00034 | 274.0                          | 18.0 | 305.7                          | 15.0  | 475        | 334         | 1.42          |
| LAV-ILMb_7  | 0.55000        | 0.08000 | 0.05840        | 0.00180 | 17.17000       | 0.39000 | 0.06910         | 0.00590 | 366.0                          | 11.0 | 880.0                          | 190.0 | 1153       | 597         | 1.93          |
| LAV-ILMb_9  | 0.42400        | 0.17000 | 0.05350        | 0.00310 | 18.92000       | 0.95000 | 0.06110         | 0.00930 | 336.0                          | 19.0 | 630.0                          | 310.0 | 1600       | 950         | 1.68          |
| LAV-ILMb_10 | 0.31300        | 0.04800 | 0.04390        | 0.00320 | 22.70000       | 1.30000 | 0.05241         | 0.00033 | 277.0                          | 20.0 | 303.0                          | 14.0  | 420        | 192         | 2.19          |
| LAV-ILMb_11 | 0.27700        | 0.09300 | 0.03920        | 0.00390 | 26.80000       | 2.40000 | 0.05290         | 0.00310 | 247.0                          | 24.0 | 313.0                          | 100.0 | 600        | 890         | 0.67          |
| LAV-ILMb_13 | 0.42800        | 0.20000 | 0.04920        | 0.00280 | 20.47000       | 0.82000 | 0.06060         | 0.00610 | 310.0                          | 17.0 | 590.0                          | 210.0 | 1024       | 973         | 1.05          |

|                    |         |         |         |         |          |         |         |         |       |      |       |       |      |     |      |
|--------------------|---------|---------|---------|---------|----------|---------|---------|---------|-------|------|-------|-------|------|-----|------|
| <b>LAV-ILMb_16</b> | 0.47200 | 0.23000 | 0.05260 | 0.00260 | 19.40000 | 1.20000 | 0.06460 | 0.01000 | 330.0 | 16.0 | 680.0 | 320.0 | 1000 | 723 | 1.38 |
| <b>LAV-ILMb_17</b> | 0.32800 | 0.02700 | 0.04560 | 0.00180 | 22.05000 | 0.72000 | 0.05257 | 0.00032 | 287.1 | 11.0 | 310.0 | 14.0  | 475  | 980 | 0.48 |
| <b>LAV-ILMb_18</b> | 0.70000 | 0.15000 | 0.07060 | 0.00710 | 14.00000 | 1.30000 | 0.06180 | 0.00520 | 439.0 | 42.0 | 630.0 | 150.0 | 87   | 540 | 0.16 |
